# Supplementary material
Source: Springer Nature journal article supplement (https://www.springermedizin.de/resource/supplementary/12888_2013_1856_MOESM2_ESM.pdf/9480328)
Supplement: MOESM2 [file 9480328]

Studies identified by PsycINFO ( $k = 781$ ) and Medline ( $k = 404$ )

Exclusion of duplicate studies from both databases ( $k = 239$ ) and those that obviously did not address the research questions based on a review of title and/or abstract ( $k = 839$ )

Review of studies meeting broad eligibility criteria for review from search ( $k = 107$ ) and review of reference lists ( $k = 9$ ).

Studies included in review ( $k = 24$ ); 2 additional studies (Sacks et al., 2007; Tien et al., 1993) were overlapping with included studies, but were used for additional information as needed.

Studies excluded upon in depth review ( $k = 90$ )

*Inclusion Criteria*

- Not Systematic screening process ( $k = 47$ )
- No appropriate criterion measure ( $k = 62$ )
- Insufficient information to evaluate the tool ( $k = 65$ )

*Exclusion criteria*

- Diagnoses were exclusively substance use, cognitive, or antisocial personality or malingering ( $k = 16$ )
- Forensic setting ( $k = 10$ )
